# Supplementary figures and images for: Bodipy/dipyridylamino-based “turn-on” fluorescent chemosensor for trivalent chromium cations: characterization and photophysical properties
Source: Royal Society of Chemistry journal article supplement (doi:10.1039/c4ra12874e), 2014-12-19

### The $^1\text{H-NMR}$ 's of compounds

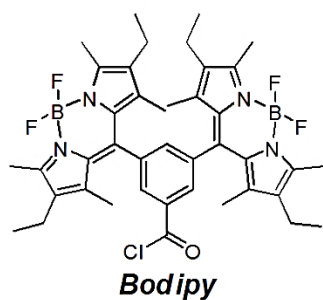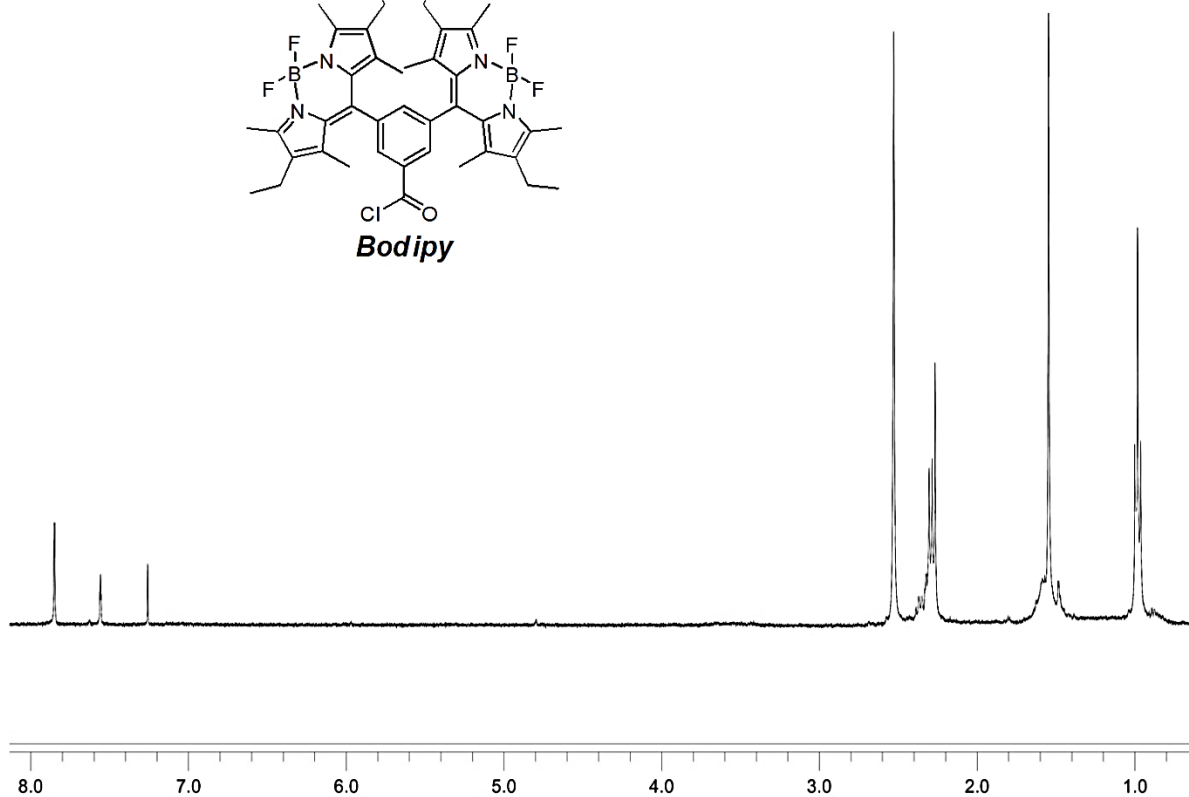

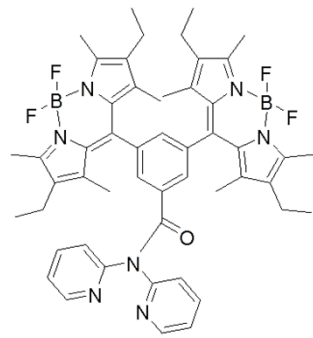

**Bodipy-DPy**

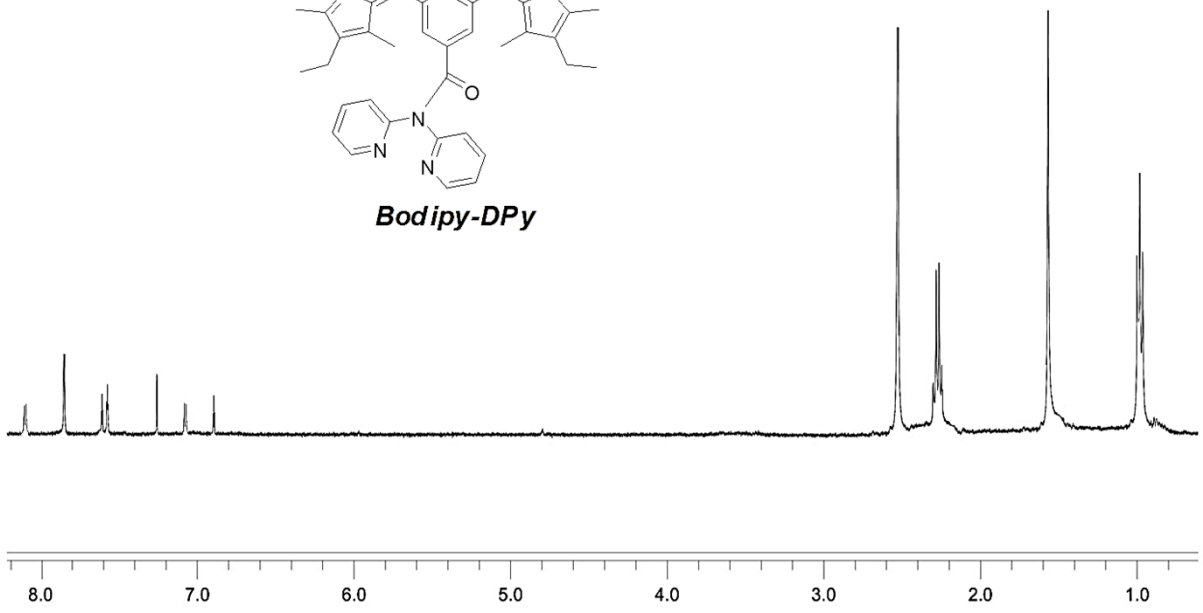

Supplement: c4ra12874e1.pdf [file c4ra12874e1.pdf]
